# Supplementary material
Source: PubMed Central journal article supplement (PMC8054516)
Supplement: Supp_Data.pdf [file Supp_Data.pdf]

**Fibrinolysis after Traumatic Brain Injury** Fair et al.

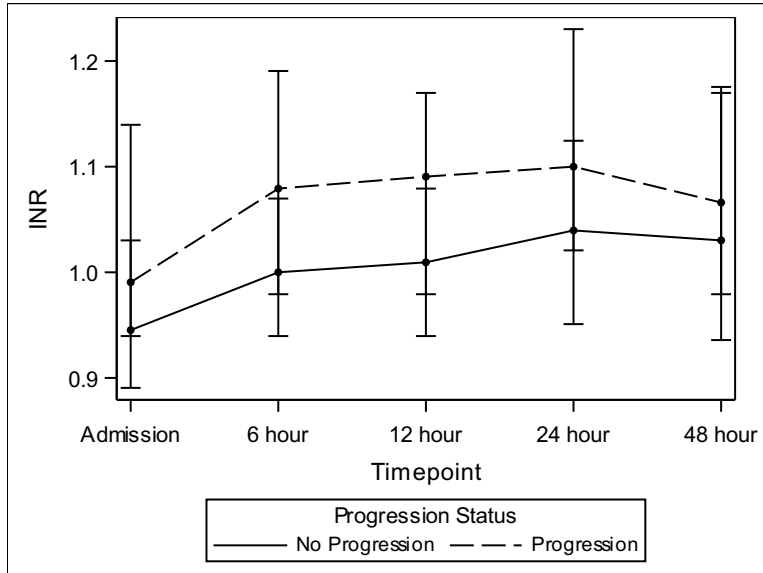

**Supplementary FIG. 1** INR values admission to 48 hours (median with IQR).

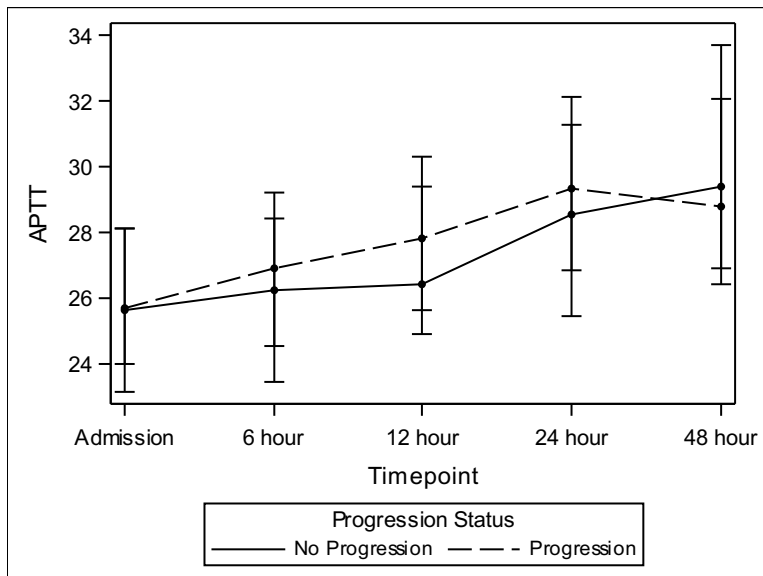

**Supplementary FIG. 2** aPTT values admission to 48 hours (median with IQR).

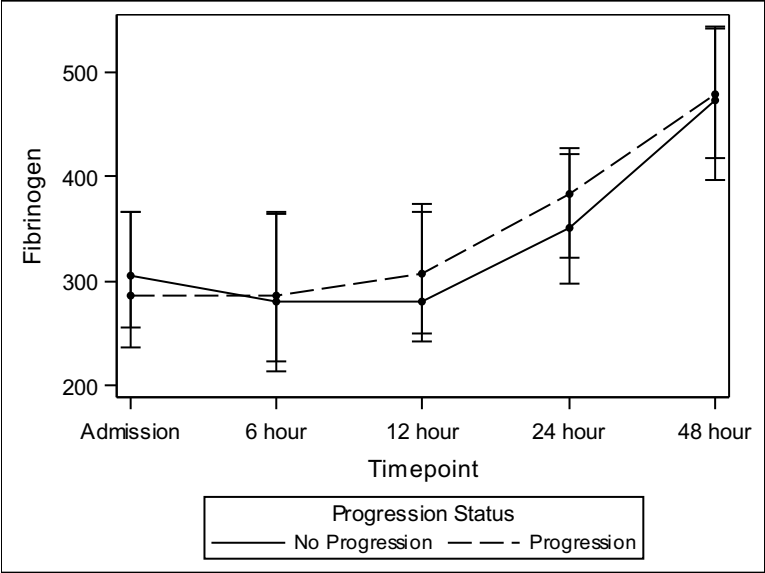

**Supplementary FIG. 3** Fibrinogen values admission to 48 hours (median with IQR).

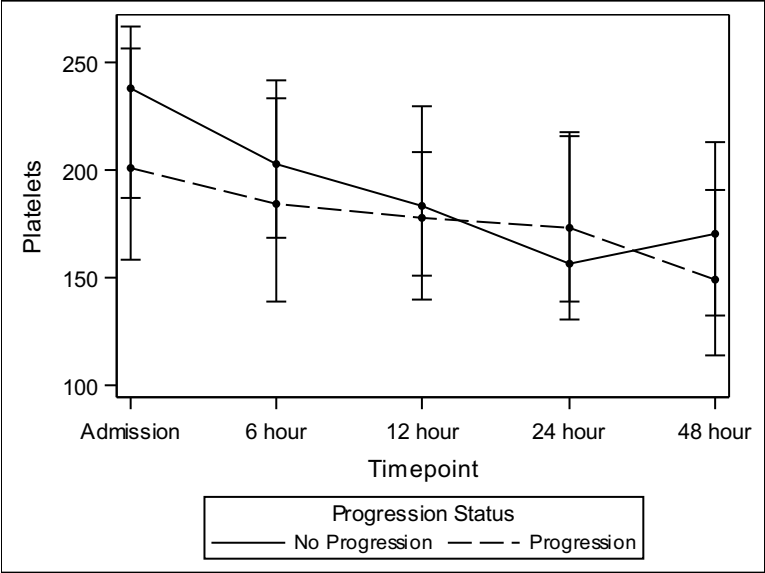

**Supplementary FIG. 4** Platelet values admission to 48 hours (median with IQR).

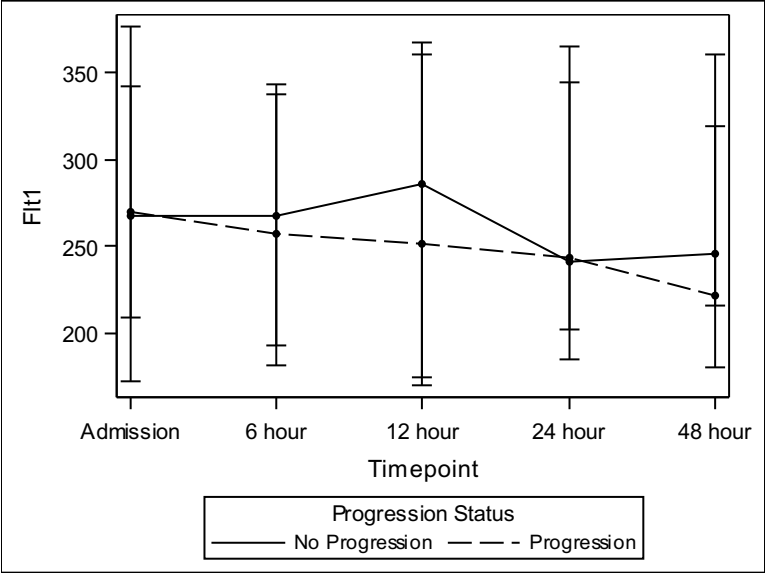

**Supplementary FIG. 5** F1+2 values admission to 48 hours (median with IQR).

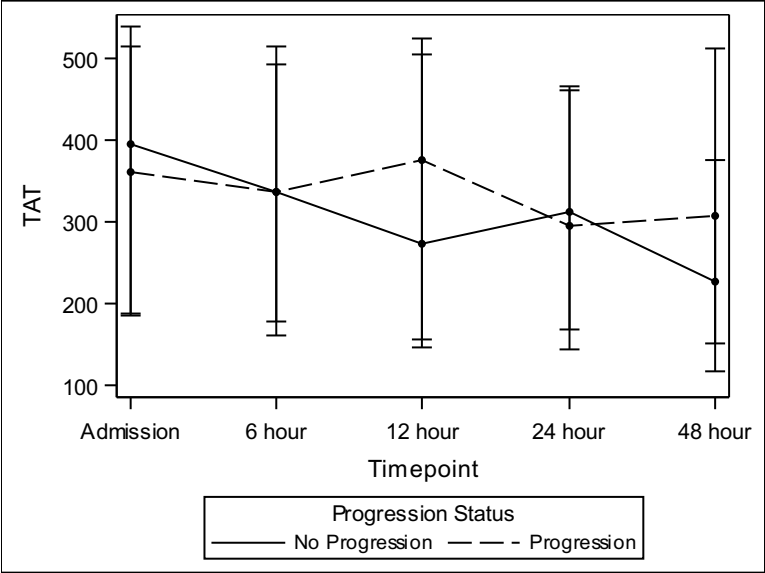

**Supplementary FIG. 6** Thrombin-antithrombin values admission to 48 hours (median with IQR).

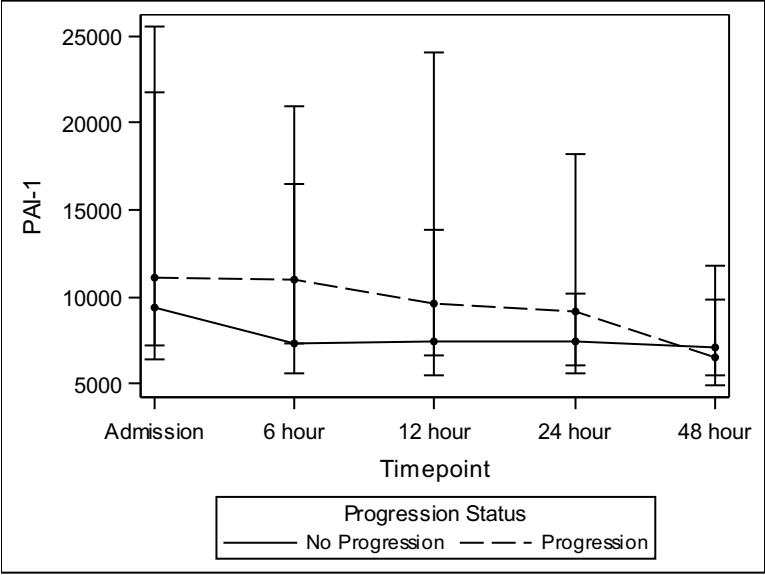

**Supplementary FIG. 7** PAI-1 values admission to 48 hours (median with IQR).

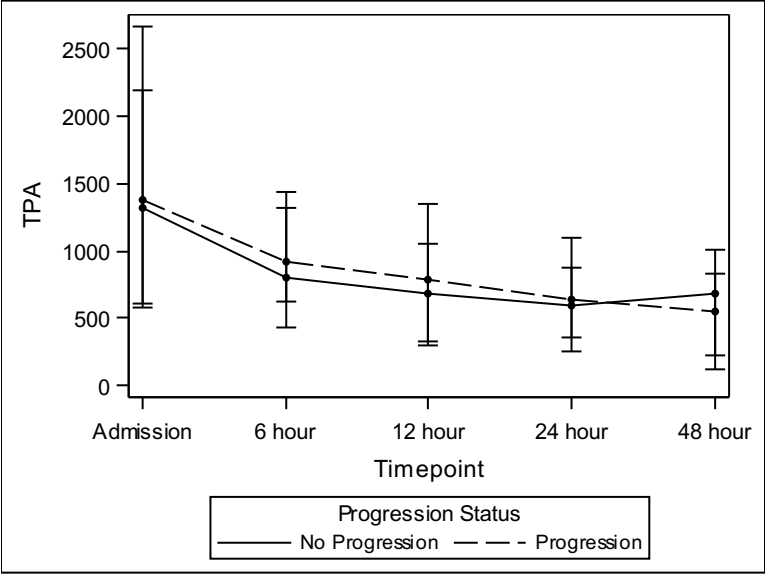

**Supplementary FIG. 8** tPA values admission to 48 hours (median with IQR).

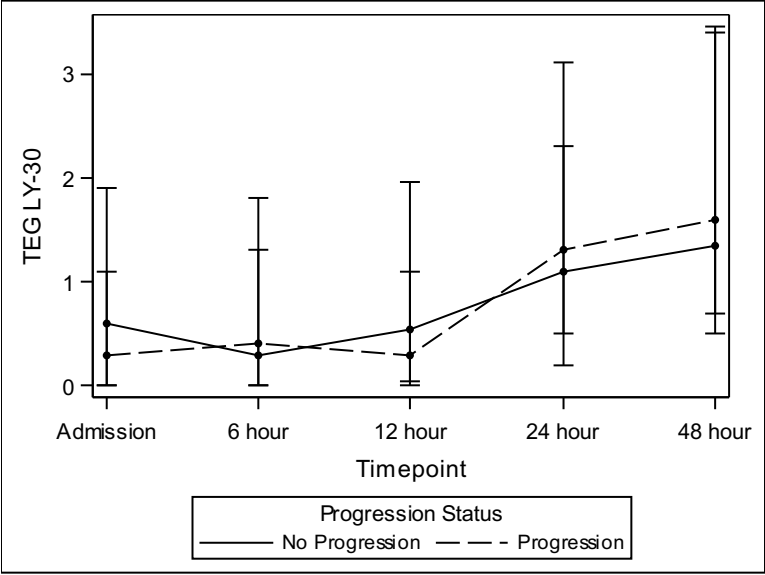

**Supplementary FIG. 9** TEG LY30 values admission to 48 hours (median with IQR).
